# Supplementary material
Source: PubMed Central journal article supplement (PMC11099950)
Supplement: NIHMS1992321-supplement-Supplemental.pdf [file NIHMS1992321-supplement-Supplemental.pdf]

# Supplemental material for “On the integration of decision trees with mixture cure model”

Wisdom Aselisewine and Suvra Pal

Department of Mathematics, University of Texas at Arlington,  
Arlington, Texas 76019, United States

## A1. R code for data generation

```
mydata = function(n, alpha, beta1, beta2, cens, setting){
  z1 = rnorm(n, mean=0, sd=1) # z1 and z2 are the two continuous covariates
    # generated independently from standard normal distributions
  z2 = rnorm(n, mean=0, sd=1)

  piz = rep(NA, n) # this is the uncured probability pi(z)
  if(setting==1){ # linear classification boundary
    piz = (exp(0.3 - (5*z1) - (3*z2)) / (1 + exp(0.3 - (5*z1) - (3*z2))))
  }
  if(setting==2){ # non-linear classification boundary
    piz = (exp(0.3 - (5*z1*z2) - (3*z1*z2)) / (1 + exp(0.3 - (5*z1*z2) - (3*z1*z2))))
  }

  C = runif(n, 0, cens) # censoring time
  U = runif(n, 0, 1)
  Y = rep(NA, n) # observed lifetime
  D = rep(NA, n) # censoring indicator
  J = rep(NA, n) # cured indicator (J=0 implies cured)
  Sp = rep(NA, n) # overall (population) survival function
  S1 = rep(NA, n) # survival function of susceptible group
  for(i in 1:n){
    if(U[i] <= 1 - piz[i]){
      Y[i] = C[i]
      D[i] = 0
      J[i] = 0
      S1[i] = exp(-((Y[i] / exp(-((beta1*z1[i]) + (beta2*z2[i])) / alpha))) ^ alpha))
      Sp[i] = (1 - piz[i]) + (piz[i] * exp(-((Y[i] / exp(-((beta1*z1[i]) + (beta2*z2[i])) / alpha))) ^ alpha))
    }
  }
  else{
```

```

T = rweibull(1, shape=alpha, scale= exp(-((beta1*z1[i])+(beta2*z2[i]))/alpha))
Y[i] = min(T,C[i])
J[i] = 1
S1[i] = exp(-((Y[i]/exp(-((beta1*z1[i])+(beta2*z2[i]))/alpha))^alpha))
Sp[i] = (1-piz[i]) + (piz[i]*exp(-((Y[i]/exp(-((beta1*z1[i])
+(beta2*z2[i]))/alpha))^alpha))
if(Y[i]==C[i]){
  D[i] = 0
}
else{
  D[i] = 1
}
}
}
return(data.frame(Y,D,z1,z2,J,uncure=piz,S1,Sp=Sp))
} # function to generate data under 3 different classification boundaries

```

## A2. R code for DT-based EM algorithm

```
library(e1071)
library(survival)
library(rpart)

smsurv <-function(Time, Status, X, beta, w, model){

death_point <- sort(unique(subset(Time, Status==1)))
if(model=='ph') coxexp <- exp((beta)%*%t(X[, -1]))
lambda <- numeric()
event <- numeric()
for(i in 1:length(death_point)){
event[i] <- sum(Status*as.numeric(Time==death_point[i]))
if(model=='ph') temp <- sum(as.numeric(Time>=death_point[i])*w*drop(coxexp))
if(model=='aft') temp <- sum(as.numeric(Time>=death_point[i])*w)
temp1 <- event[i]
lambda[i] <- temp1/temp
}
HHazard <- numeric()
for(i in 1:length(Time)){
HHazard[i] <- sum(as.numeric(Time[i]>=death_point)*lambda)
if(Time[i]>max(death_point))HHazard[i] <- Inf
if(Time[i]<min(death_point))HHazard[i] <- 0
}
survival <- exp(-HHazard)
list(survival=survival)
}

# EM code

em.dt.RC = function(Time, Status, X, X1, Z, Z1, offsetvar, uncureprob, uncurepred, beta,
emmax, eps, data, testdata)
{

w <- Status
n <- length(Status)
m <- dim(testdata)[1]
s <- smsurv(Time, Status, X, beta, w, model="ph")$survival

convergence<- 1000; i <-1
while (convergence > eps & i < emmax){
#print(i)
survival<-drop(s^(exp((beta)%*%t(X[, -1]))))
}
```

```

## E step
w <- Status+(1-Status)*(uncureprob*survival)/((1-uncureprob)
+uncureprob*survival)

## M step
multipleuncureprob=matrix(1:5*n, nrow=n, ncol=5)
for (j in 1:n){multipleuncureprob[j,]<-rbinom(5,size = 1,prob=w[j])}

uncureprob1<-c(1,1)
uncureprob2<-c(1,1)
uncureprob3<-c(1,1)
uncureprob4<-c(1,1)
uncureprob5<-c(1,1)

for (j in 1:n){uncureprob1[j]=multipleuncureprob[j,1]}
for (j in 1:n){uncureprob2[j]=multipleuncureprob[j,2]}
for (j in 1:n){uncureprob3[j]=multipleuncureprob[j,3]}
for (j in 1:n){uncureprob4[j]=multipleuncureprob[j,4]}
for (j in 1:n){uncureprob5[j]=multipleuncureprob[j,5]}

for (j in 1:n){uncureprob1[j]=uncureprob1[j]}
for (j in 1:n){uncureprob2[j]=uncureprob2[j]}
for (j in 1:n){uncureprob3[j]=uncureprob3[j]}
for (j in 1:n){uncureprob4[j]=uncureprob4[j]}
for (j in 1:n){uncureprob5[j]=uncureprob5[j]}

uncureprob1<-as.factor(uncureprob1)
uncureprob2<-as.factor(uncureprob2)
uncureprob3<-as.factor(uncureprob3)
uncureprob4<-as.factor(uncureprob4)
uncureprob5<-as.factor(uncureprob5)

update_cureb<-c(1,1)
update_pred<-c(1,1)

obj3 <- tune.rpart(uncureprob1~Z[,-1], data = data, minsplit =c(11,20,25),
cp = c(0.001,0.005,0.01))
bc<-obj3$best.parameters[1]
bg<-obj3$best.parameters[2]

mod1 <- rpart(formula = uncureprob1~z1+z2, data = data,
method = "class", control = rpart.control(minsplit = bc[[1]],
minbucket = round(bc[[1]]/3), cp = bg[[1]]), xval = 10,
parms = list(split="gini"))

cp.min1<-mod1$cptable[which.min(mod1$cptable[, "xerror"]), "CP"]

```

```

tree1<-prune(mod1, cp=cp.min1)

proba1 <- predict(tree1, newdata = data, type = "prob")
cproba1 <- predict(tree1, newdata = testdata, type = "prob")

update_cureb1<-c(1,1)
update_pred1<-c(1,1)
for (z in 1:n){update_cureb1[z]<-proba1[z, colnames(proba1)==1]}
for (d in 1:m){update_pred1[d]<-cproba1[d, colnames(cproba1)==1]}
uncureprob1<-as.numeric(as.character(uncureprob1))

mod2 <- rpart(formula = uncureprob2~z1+z2, data = data,
method = "class", control = rpart.control(minsplit = bc[[1]],
minbucket = round(bc[[1]]/3), cp = bg[[1]]), xval = 10,
parms = list(split="gini"))

cp.min2<-mod2$cptable[which.min(mod2$cptable[, "xerror"]), "CP"]
tree2<-prune(mod2, cp=cp.min2)

proba2 <- predict(tree2, newdata = data, type = "prob")
cproba2 <- predict(tree2, newdata = testdata, type = "prob")

update_cureb2<-c(1,1)
update_pred2<-c(1,1)
for (z in 1:n){update_cureb2[z]<-proba2[z, colnames(proba2)==1]}
for (d in 1:m){update_pred2[d]<-cproba2[d, colnames(cproba2)==1]}
uncureprob2<-as.numeric(as.character(uncureprob2))

mod3 <- rpart(formula = uncureprob3~z1+z2, data = data,
method = "class", control = rpart.control(minsplit = bc[[1]],
minbucket = round(bc[[1]]/3), cp = bg[[1]]), xval = 10,
parms = list(split="gini"))

cp.min3<-mod3$cptable[which.min(mod3$cptable[, "xerror"]), "CP"]
tree3<-prune(mod3, cp=cp.min3)

proba3 <- predict(tree3, newdata = data, type = "prob")
cproba3 <- predict(tree3, newdata = testdata, type = "prob")

update_cureb3<-c(1,1)
update_pred3<-c(1,1)
for (z in 1:n){update_cureb3[z]<-proba3[z, colnames(proba3)==1]}
for (d in 1:m){update_pred3[d]<-cproba3[d, colnames(cproba3)==1]}
uncureprob3<-as.numeric(as.character(uncureprob3))

mod4 <- rpart(formula = uncureprob4~z1+z2, data = data,

```

```

method = "class", control = rpart.control(minsplit = bc[[1]],
minbucket = round(bc[[1]]/3), cp = bg[[1]], xval = 10,
parms = list(split="gini"))
cp.min4<-mod4$cptable[which.min(mod4$cptable[, "xerror"]), "CP"]
tree4<-prune(mod4, cp=cp.min4)

proba4 <- predict(tree4, newdata = data, type = "prob")
cproba4 <- predict(tree4, newdata = testdata, type = "prob")

update_cureb4<-c(1,1)
update_pred4<-c(1,1)
for (z in 1:n){update_cureb4[z]<-proba4[z, colnames(proba4)==1]}
for (d in 1:m){update_pred4[d]<-cproba4[d, colnames(cproba4)==1]}
uncureprob4<-as.numeric(as.character(uncureprob4))

mod5 <- rpart(formula = uncureprob5~z1+z2, data = data,
method = "class", control = rpart.control(minsplit = bc[[1]],
minbucket = round(bc[[1]]/3), cp = bg[[1]], xval = 10,
parms = list(split="gini"))

cp.min5<-mod5$cptable[which.min(mod5$cptable[, "xerror"]), "CP"]
tree5<-prune(mod5, cp=cp.min5)

proba5 <- predict(tree5, newdata = data, type = "prob")
cproba5 <- predict(tree5, newdata = testdata, type = "prob")

update_cureb5<-c(1,1)
update_pred5<-c(1,1)
for (z in 1:n){update_cureb5[z]<-proba5[z, colnames(proba5)==1]}
for (d in 1:m){update_pred5[d]<-cproba5[d, colnames(cproba5)==1]}
uncureprob5<-as.numeric(as.character(uncureprob5))

for (z in 1:n){update_cureb[z]<-(update_cureb1[z]+update_cureb2[z]
+update_cureb3[z]+update_cureb4[z]+update_cureb5[z])/5}
for (d in 1:m){update_pred[d]<-(update_pred1[d]+update_pred2[d]
+update_pred3[d]+update_pred4[d]+update_pred5[d])/5}

update_beta <- coxph(Surv(Time, Status)~X[,-1]+offset(log(w)), subset=w!=0,
method="breslow")$coef
update_s <-smsurv(Time, Status, X, beta, w, model="ph")$survival
convergence<-sum(c(mean(update_cureb)-mean(uncureprob), update_beta-beta,
mean(update_s)-mean(s))^2)

uncureprob <- update_cureb
uncurepred <- update_pred
beta <- update_beta

```

```

s<-update_s
i <- i+1
#print(i)
}
S1 = drop(s^(exp((beta)%*%t(X[, -1]))) # survival function of susceptible group
Sp = (1-uncureprob)+(uncureprob*S1)
em.dt <- list(latencyfit=beta, Uncureprob=uncureprob, Uncurepred=uncurepred, S0=s,
S1=S1, Sp=Sp, tau=convergence, Mod1=mod1, Mod2=mod2, Mod3=mod3, Mod4=mod4,
Mod5=mod5)
}

```

### A3. Additional figures

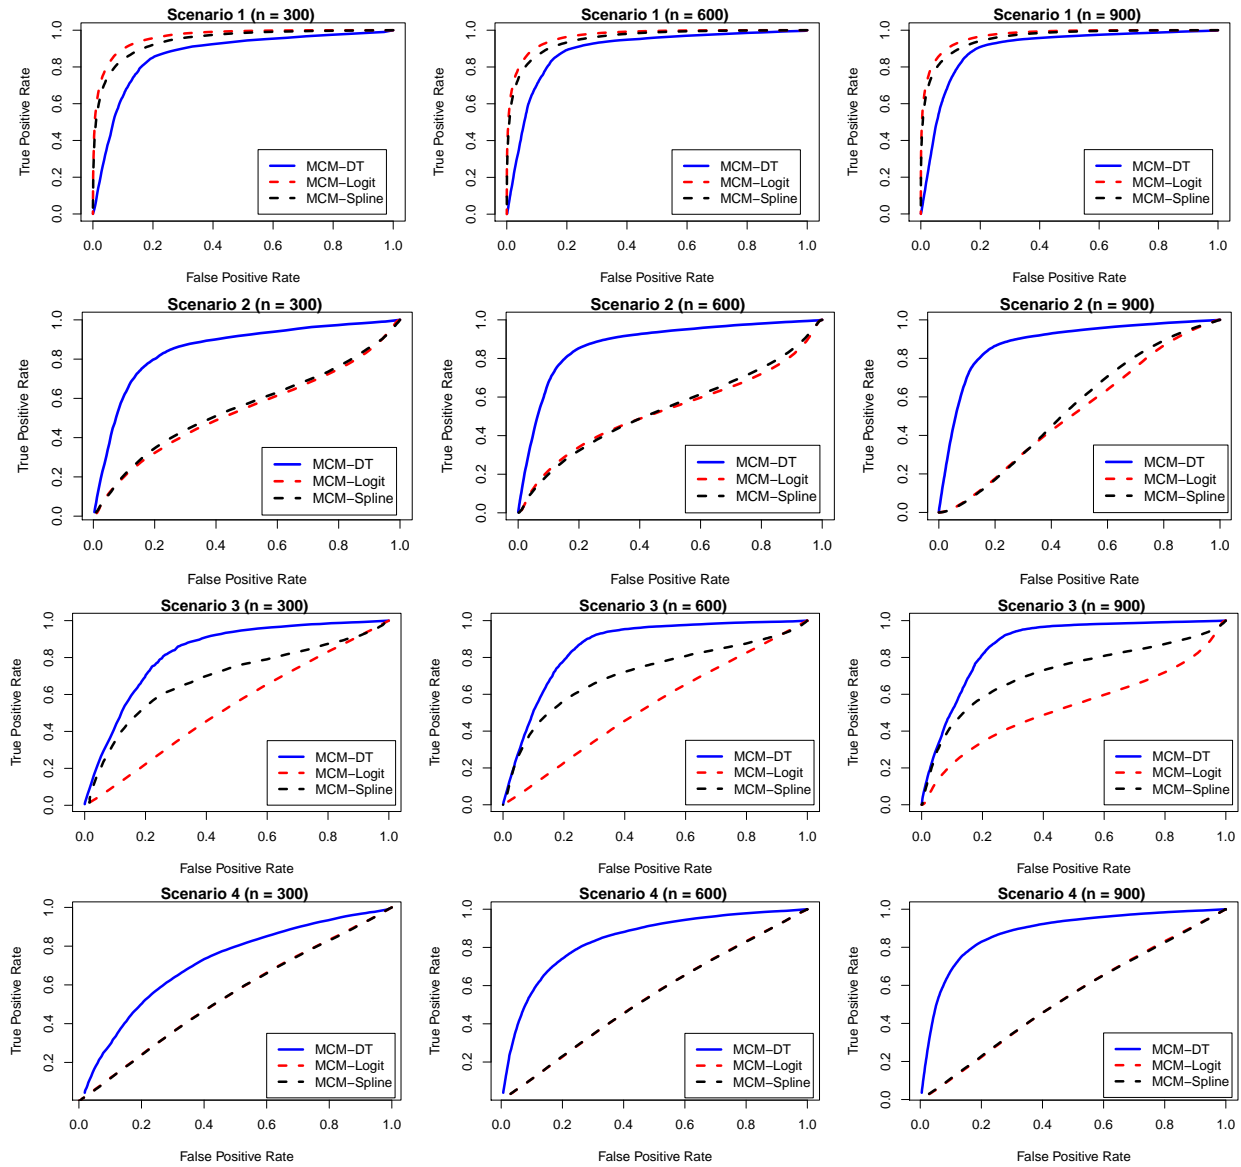

Figure A3.1: Averaged ROC curves for different models and sample sizes.



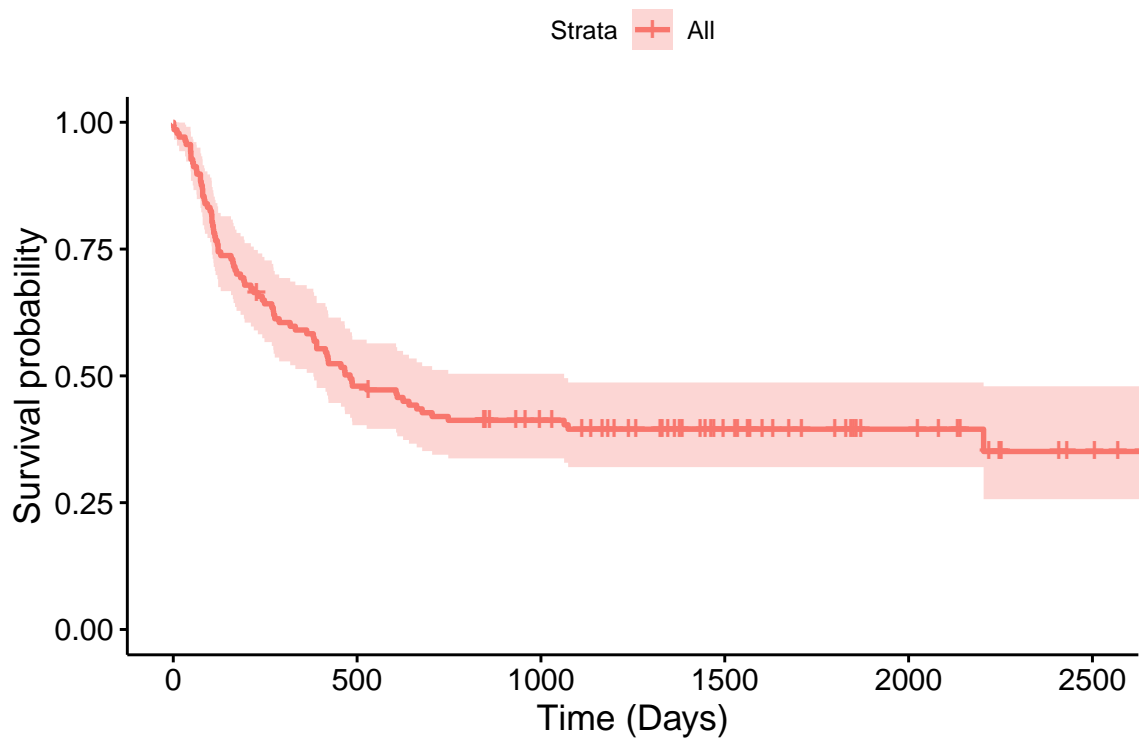

Figure A3.2: Kaplan-Meier survival curve for the leukemia data

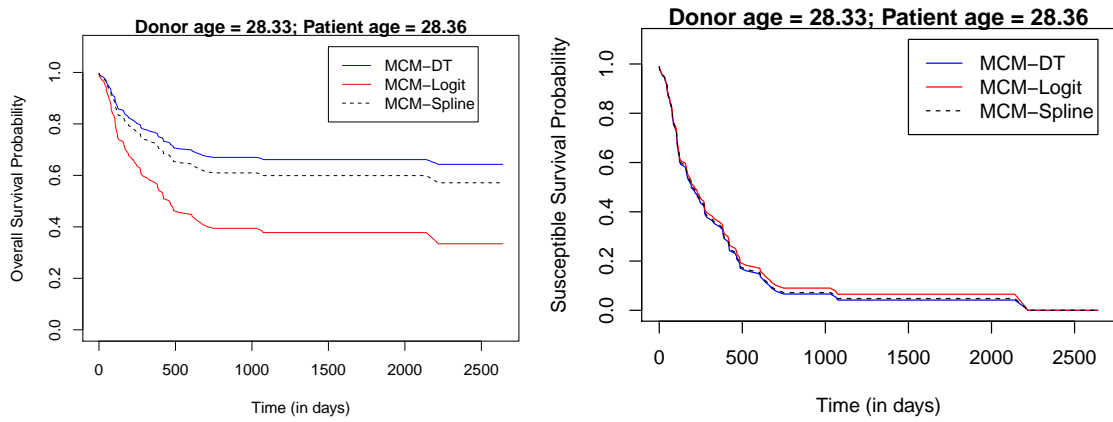

Figure A3.3: Predicted overall and susceptible survival probabilities for the mean values of donor's age and patient's based on the leukemia data

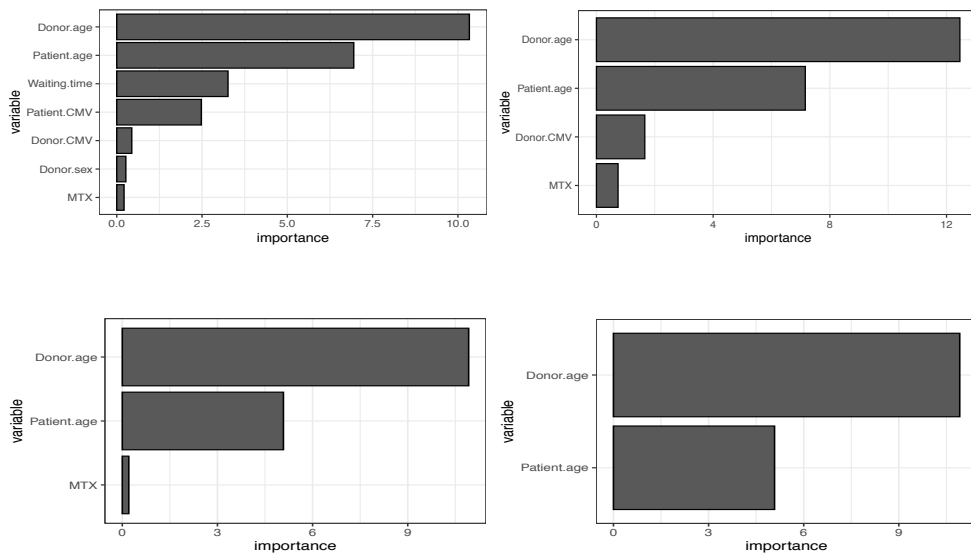

Figure A3.4: Relative variable importance plots corresponding to the leukemia data

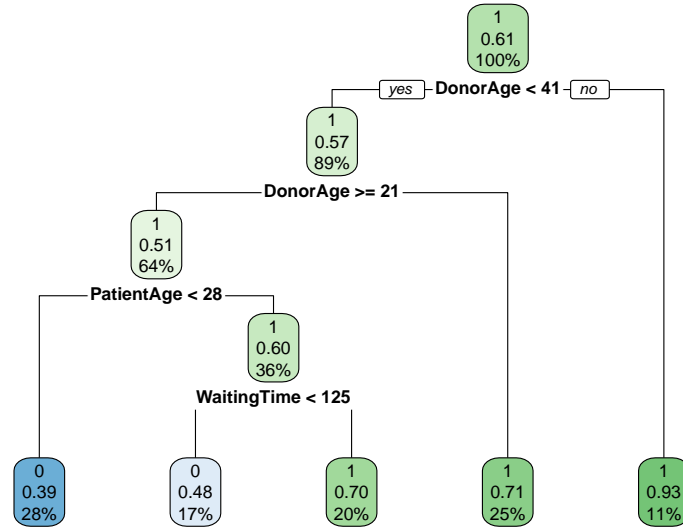

Figure A3.5: Decision tree plot corresponding to the leukemia data. Note that 0 represents cured group and 1 represents uncured group

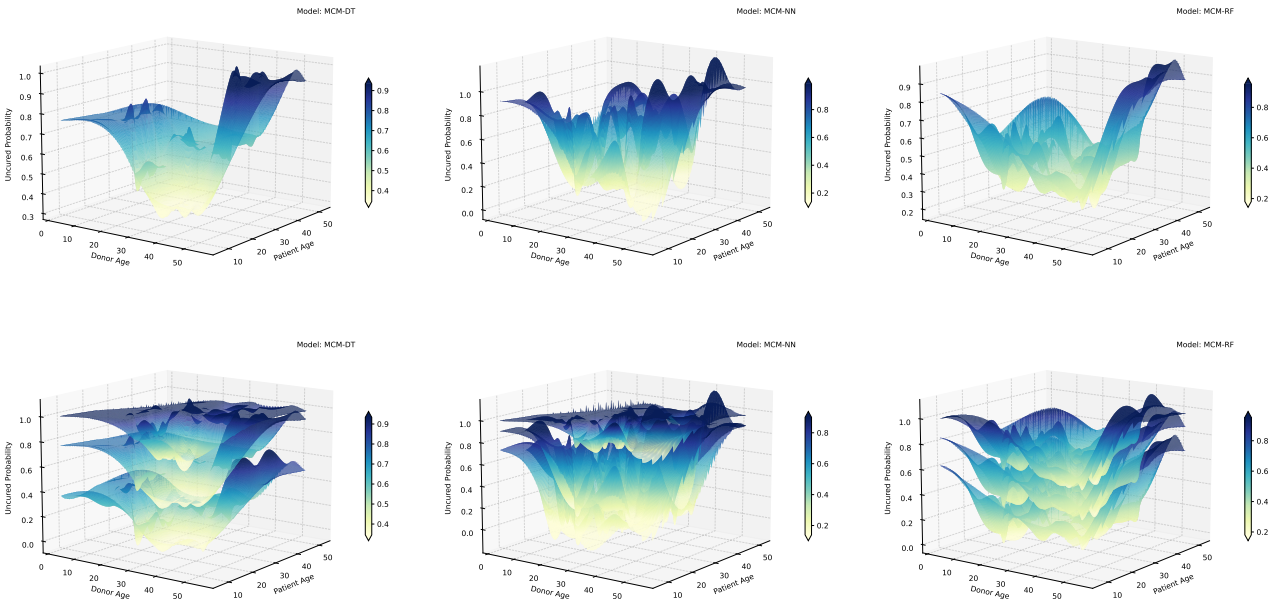

Figure A3.6: 3-dimensional surface plane of uncured probabilities, along with 95% confidence bounds, as a function of patient's age and donor's age for the DT, NN and RF models

## A4. Additional tables

Table A4.1: Bias and MSE of the baseline survival probability for different models and  $n = 600$

| Scenario | Baseline Survival Probability ( $S_{u0}(t)$ ) |        |        |        |        |        |
|----------|-----------------------------------------------|--------|--------|--------|--------|--------|
|          | Bias                                          |        |        | MSE    |        |        |
|          | DT                                            | Spline | Logit  | DT     | Spline | Logit  |
| 1        | 0.0319                                        | 0.0338 | 0.0371 | 0.0017 | 0.0019 | 0.0023 |
| 2        | 0.0314                                        | 0.0269 | 0.0280 | 0.0015 | 0.0012 | 0.0013 |
| 3        | 0.0424                                        | 0.0396 | 0.0327 | 0.0027 | 0.0024 | 0.0017 |
| 4        | 0.0163                                        | 0.0164 | 0.0165 | 0.0009 | 0.0009 | 0.0009 |

Table A4.2: Estimation results corresponding to the latency parameters for  $n = 900$

| Scenario | Parameter | Estimate |        |        | Standard Error |        |       |
|----------|-----------|----------|--------|--------|----------------|--------|-------|
|          |           | Logit    | Spline | DT     | Logit          | Spline | DT    |
| 1        | $\beta_1$ | 0.798    | 0.666  | 0.423  | 0.116          | 0.124  | 0.286 |
|          | $\beta_2$ | 0.342    | 0.326  | 0.166  | 0.108          | 0.108  | 0.209 |
| 2        | $\beta_1$ | 1.288    | 1.288  | 0.922  | 0.135          | 0.130  | 0.089 |
|          | $\beta_2$ | 0.877    | 0.891  | 0.607  | 0.103          | 0.103  | 0.091 |
| 3        | $\beta_1$ | 1.139    | 0.892  | 0.857  | 0.137          | 0.118  | 0.102 |
|          | $\beta_2$ | -0.104   | 0.261  | 0.316  | 0.180          | 0.114  | 0.104 |
| 4        | $\beta_1$ | 1.011    | 1.009  | 1.001  | 0.145          | 0.139  | 0.136 |
|          | $\beta_2$ | 0.888    | 0.885  | 0.891  | 0.135          | 0.153  | 0.144 |
|          | $\beta_3$ | 0.525    | 0.524  | 0.521  | 0.082          | 0.071  | 0.071 |
|          | $\beta_4$ | 1.021    | 1.020  | 1.028  | 0.091          | 0.078  | 0.080 |
|          | $\beta_5$ | -0.675   | -0.673 | -0.667 | 0.076          | 0.074  | 0.055 |

Table A4.3: Comparison of DT, NN, and RF models through latency parameter estimation for  $n = 900$

| Scenario | Parameter | Estimate |        |        | Standard Error |       |       |
|----------|-----------|----------|--------|--------|----------------|-------|-------|
|          |           | DT       | NN     | RF     | DT             | NN    | RF    |
| 1        | $\beta_1$ | 0.423    | 0.414  | 0.588  | 0.286          | 0.289 | 0.133 |
|          | $\beta_2$ | 0.166    | 0.198  | 0.237  | 0.209          | 0.241 | 0.112 |
| 2        | $\beta_1$ | 0.922    | 0.952  | 0.937  | 0.089          | 0.112 | 0.096 |
|          | $\beta_2$ | 0.607    | 0.617  | 0.609  | 0.091          | 0.102 | 0.085 |
| 3        | $\beta_1$ | 0.857    | 0.850  | 0.889  | 0.102          | 0.109 | 0.136 |
|          | $\beta_2$ | 0.316    | 0.333  | 0.346  | 0.104          | 0.123 | 0.131 |
| 4        | $\beta_1$ | 1.001    | 1.003  | 1.005  | 0.136          | 0.178 | 0.135 |
|          | $\beta_2$ | 0.891    | 1.031  | 1.138  | 0.144          | 0.268 | 0.172 |
|          | $\beta_3$ | 0.521    | 0.371  | 0.401  | 0.071          | 0.114 | 0.070 |
|          | $\beta_4$ | 1.028    | 1.108  | 1.126  | 0.080          | 0.158 | 0.089 |
|          | $\beta_5$ | -0.667   | -0.532 | -0.547 | 0.055          | 0.112 | 0.067 |

Table A4.4: Estimation results corresponding to the latency parameters for the leukemia data

| p | Parameter                | Estimate |        |        | Standard Error |        |       |
|---|--------------------------|----------|--------|--------|----------------|--------|-------|
|   |                          | Logit    | Spline | DT     | Logit          | Spline | DT    |
| 2 | $\beta_1$ (Patient Age)  | -0.499   | -0.403 | -0.385 | 0.276          | 0.272  | 0.235 |
|   | $\beta_2$ (Donor Age)    | 0.664    | 0.570  | 0.576  | 0.282          | 0.311  | 0.234 |
| 3 | $\beta_1$ (Patient Age)  | -0.319   | -0.308 | -0.299 | 0.362          | 0.268  | 0.295 |
|   | $\beta_2$ (Donor Age)    | 0.416    | 0.419  | 0.405  | 0.347          | 0.306  | 0.302 |
|   | $\beta_3$ (MTX)          | 0.913    | 0.899  | 0.908  | 0.386          | 0.323  | 0.299 |
| 4 | $\beta_1$ (Patient Age)  | -0.275   | -0.283 | -0.268 | 0.331          | 0.278  | 0.229 |
|   | $\beta_2$ (Donor Age)    | 0.338    | 0.357  | 0.329  | 0.321          | 0.290  | 0.288 |
|   | $\beta_3$ (MTX)          | 0.973    | 0.959  | 0.976  | 0.386          | 0.343  | 0.290 |
|   | $\beta_4$ (Donor CMV)    | 0.351    | 0.325  | 0.355  | 0.355          | 0.349  | 0.347 |
| 7 | $\beta_1$ (Patient Age)  | -0.255   | -0.291 | -0.281 | 0.319          | 0.283  | 0.278 |
|   | $\beta_2$ (Donor Age)    | 0.428    | 0.480  | 0.462  | 0.321          | 0.319  | 0.303 |
|   | $\beta_3$ (Waiting Time) | -0.289   | -0.282 | -0.271 | 0.184          | 0.133  | 0.149 |
|   | $\beta_4$ (Donor Sex)    | -0.071   | -0.068 | -0.090 | 0.368          | 0.350  | 0.308 |
|   | $\beta_5$ (Patient CMV)  | -0.331   | -0.324 | -0.282 | 0.425          | 0.397  | 0.387 |
|   | $\beta_6$ (Donor CMV)    | 0.097    | 0.071  | 0.106  | 0.480          | 0.425  | 0.389 |
|   | $\beta_7$ (MTX)          | 1.132    | 1.106  | 1.108  | 0.430          | 0.380  | 0.310 |

Table A4.5: Computation times for the leukemia data

| Model  | Computation Times (in seconds) |         |         |         |
|--------|--------------------------------|---------|---------|---------|
|        | $p=2$                          | $p=3$   | $p=4$   | $p=7$   |
| Logit  | 4.198                          | 4.158   | 5.224   | 6.802   |
| Spline | 57.703                         | 75.337  | 82.716  | 95.871  |
| DT     | 103.100                        | 138.225 | 152.410 | 227.274 |

Table A4.6: Comparison of DT, NN, and RF models through the estimation of latency parameters for the leukemia data

| Model | Estimate                |                       | Standard Error |           | p-value   |           |
|-------|-------------------------|-----------------------|----------------|-----------|-----------|-----------|
|       | $\beta_1$ (Patient Age) | $\beta_2$ (Donor Age) | $\beta_1$      | $\beta_2$ | $\beta_1$ | $\beta_2$ |
| DT    | -0.385                  | 0.576                 | 0.235          | 0.234     | 0.097     | 0.014     |
| NN    | -0.301                  | 0.472                 | 0.234          | 0.240     | 0.096     | 0.036     |
| RF    | -0.349                  | 0.520                 | 0.286          | 0.292     | 0.145     | 0.075     |
